# Supplementary material for: Rare Earth FreeZn3V2O8Phosphor with Controlled Microstructure and Its Photocatalytic Activity
Source: Hindawi journal article supplement (doi:10.1155/2013/410613), 2013-01-01
Supplement: f1 [file 410613.f1.docx]

Supporting Fig.S1

Fig.S1 XRD patterns of series M3V2O8 phosphor prepared at 775 oC by solid state method.

Supporting Fig. S2

Fig.S2 CIE color chromatogram of M3V2O8 (M= Zn, Mg, Sr, Ca) during black light exposure.

Supporting Fig. S3

Fig.S3 XRD patterns of Zn3V2O8 sintered at 775 oC with different composition of Zn and V.

Supporting Fig. S4

Fig.S4 Emission profiles of Zn3V2O8 phosphor in black light without filter containing 5 mol% of RE3+ ions (RE = Eu, Ce, Tb, Bi).

Supporting Fig. S5

Fig.S5 Emission profiles of Zn3V2O8 phosphor in black light without filter substituted by 10 mol% Tn metal ions (Tn = Ti, Cr, Mn, Co, Cu).

Supporting Fig. S6

Fig.S6 Emission profiles of Zn3V2O8 phosphor in black light without filter containing 5 mol% of Mn+ ions (M = Na, Mg, Al, Si, Ag, Sr).

Supporting Fig. S7

Fig.S7 Photocatalytic MB degradation under tungsten-halogen light irradiation over Zn3V2O8 synthesized by different methods.

Supporting Fig. S8

Fig.S8 Experimental system for MB decomposition using M3V2O8 (M = Zn, Mg, Ca, Sr).

.
